# Supplementary material
Source: PubMed Central journal article supplement (PMC6126388)
Supplement: 137810_1_supp_155490_pwhh3z.pdf [file 137810_1_supp_155490_pwhh3z.pdf]

## Supplemental material

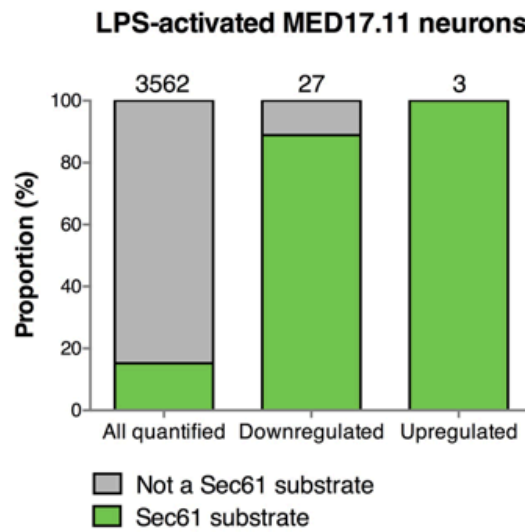

**Figure S1:** The proportion of Sec61 substrates in “all quantified” proteins is compared to that in “mycolactone-downregulated” or “mycolactone-upregulated” proteins, in MED17.11 cells exposed to mycolactone or not for 30 min, prior to activation with 10 nM LPS. The number of identified proteins in each subset is indicated on the top of each bar.

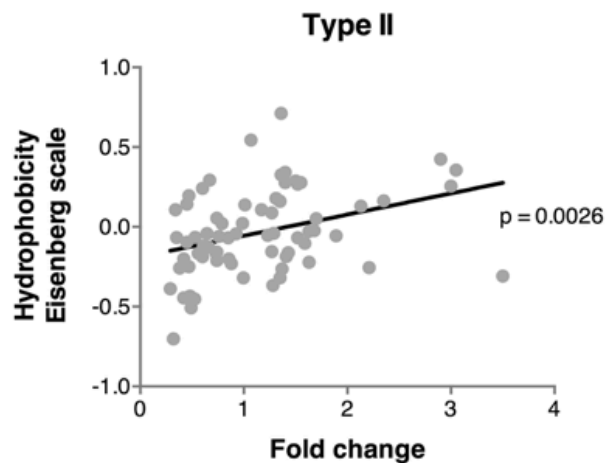

**Figure S2:** Average hydrophobicity of the 20-aminoacid long segments flanking the first N-terminal TMD, as a function of protein level variation (mycolactone/control relative LFQ intensity factor), in Type II TMPs of mycolactone-exposed MutuDCs. Linear regression line and p-value from Pearson’s correlation test are shown.

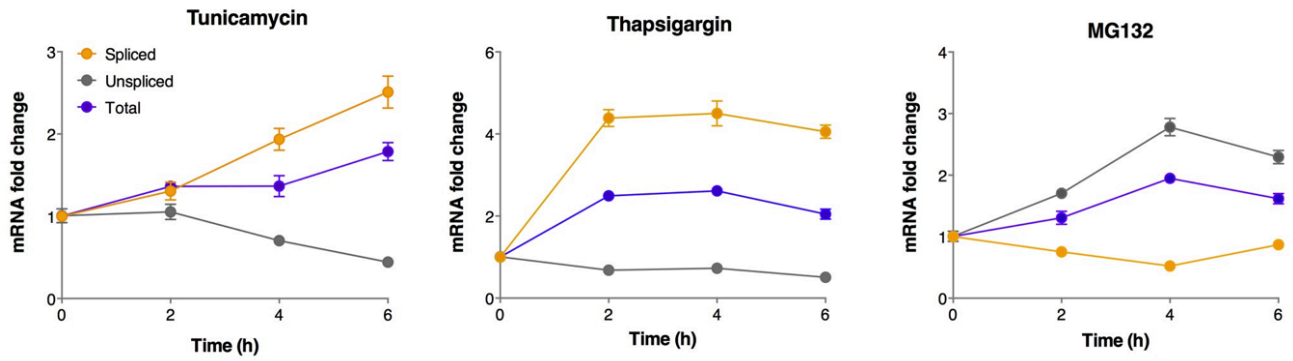

**Figure S3:** Differential effects of canonical ER stressors on Xbp-1 splicing. The kinetic effects of Tunicamycin (1 $\mu$ M), Thapsigargin (1 $\mu$ M) and MG132 (1  $\mu$ M) on MutuDC expression of total, spliced and unspliced Xbp-1 are shown.

**Table S1. MED17.11 proteins modulated by mycolactone.** Excel file with three tabs: [Differentially expressed tab]: List of all proteins found differential expressed in response to mycolactone in both non-activated and LPS activated conditions. [All quantified tab] List all the proteins that were quantified in the analysis. Proteins in each category are shown with Uniprot accession number, FDR, variation extent of mycolactone/control, gene name and an indication of whether the protein is a Sec61 substrate inferred according to [www.uniprot.org](http://www.uniprot.org). Upregulated: significantly upregulated by mycolactone (FDR $\leq$ 0.1, log<sub>2</sub> mycolactone/control ratio $>$ 0.5). Downregulated: significantly downregulated by mycolactone (FDR $\leq$ 0.1, log<sub>2</sub> mycolactone/control ratio $<$ -0.5). [Statistics tab] Statistics on Sec61 substrates in each category, as shown in Figures 1 and 2.

**Table S2: qPCR primers used in this study**

| Genebank     | Name                     | Primer-Forward          | Primer-Reverse            |
|--------------|--------------------------|-------------------------|---------------------------|
| NM_009078    | Rpl-19                   | TACTGCCAATGCTCGG        | AACACATTCCCTTTGACC        |
| NM_022331.1  | Herpud1                  | ACTCTCGCTGAGCAGATTT     | CTCTGTCTGAACGGAAACCA      |
| NM_024439    | Vimp/Selenos             | GCAGGAAGATCTAAATGCC     | CATGCTGTCCCACATTTCAA      |
| NM_010442.2  | Hmox1 (Heme oxygenase 1) | AGGTACACATCCAAGCCGAGA   | CATCACCAGCTTAAAGCCTTCT    |
| NM_009735    | Beta2 microglobulin      | TTCTGGTCTGTCTCACTGA     | CAGTATGTTCCGGCTTCCCATTC   |
| NM_001161413 | SLC3a2 /CD98hc           | TGATGAATGCACCTTGTACTTG  | TCCCAGTGAAAGTGGA          |
| NM_001271730 | Spliced Xbp1             | CTGAGTCCGAATCAGGTGCAG   | GTCCATGGGAAGATGTTCTGG     |
| NM_001271730 | Unspliced Xbp1           | CAGCACTCAGACTATGTGCA    | GTCCATGGGAAGATGTTCTGG     |
| NM_001271730 | Total Xbp1               | TGGCCGGGTCTGCTGAGTCCG   | GTCCATGGGAAGATGTTCTGG     |
| NM_001290183 | Chop                     | CCACCACACCTGAAAGCAGAA   | AGGTGAAAGGCAGGGACTCA      |
| NM_001163434 | Bip                      | TTCAGCCAATTATCAGCAAATCT | TTTTCTGATGTATCCTTTCACCAGT |

**Table S3: Comparison of mycolactone-modulated proteins across datasets.** All human proteins found in the Jurkat cell dataset were mapped to their mouse orthologs when available. Human genes for which no mouse ortholog was found were not included. The numbers in the table correspond to the number of genes that were found upregulated/downregulated/not modulated in multiple datasets; the percentages represent the proportion of these genes to the total above. Note that the total numbers of detected genes are slightly lower than the numbers of detected proteins presented in other figures, due to missing or

redundant protein to gene mapping.

|                |               | Total | MutuDCs         |               |               | MED17.11 neurons |              |               |
|----------------|---------------|-------|-----------------|---------------|---------------|------------------|--------------|---------------|
| Total          |               |       | Not modulated   | Upregulated   | Downregulated | Not modulated    | Upregulated  | Downregulated |
| Total          |               |       | 2806            | 169           | 206           | 3473             | 8            | 45            |
| Jurkat T cells | Not modulated | 2002  | 1018<br>(36.3%) | 51<br>(30.2%) | 51<br>(24.8%) | 1137<br>(32.7%)  | 1<br>(12.7%) | 3<br>(6.5%)   |
|                | Upregulated   | 1     | 0<br>(0%)       | 1<br>(0.6%)   | 0<br>(0%)     | 1<br>(0.03%)     | 0<br>(0%)    | 0<br>(0%)     |
|                | Downregulated | 29    | 6<br>(0.2%)     | 0<br>(0%)     | 9<br>(4.4%)   | 10<br>(0.3%)     | 0<br>(0%)    | 3<br>(6.5%)   |
| MutuDCs        | Not modulated | 2806  |                 |               |               | 2094<br>(60.3%)  | 2<br>(25%)   | 4<br>(8.7%)   |
|                | Upregulated   | 169   |                 |               |               | 123<br>(3.5%)    | 1<br>(12.5%) | 0<br>(0%)     |
|                | Downregulated | 206   |                 |               |               | 131<br>(3.8%)    | 0<br>(0%)    | 9<br>(19.6%)  |

Table S4. Detailed information on MED17.11 neuron peptide and protein identifications
